# Supplementary material for: Nonpsychiatric Outpatient Care for Adults With Serious Mental Illness in California: Who Is Being Left Behind?
Source: Atypon-hosted journal article supplement (doi:10.1176/appi.ps.201600284), 2017-03-01
Supplement: appi.ps.201600284.ds001.pdf [file appi.ps.201600284.ds001.pdf]

## Appendix: Medications

The medications included in this study were extracted by the California Department of Health Care Services (DHCS) Medi-Cal pharmacy data based on general therapeutic category (GTC) and selective therapeutic category (STC). The following is a list of medications included in this study:

| <b>Antipsychotic medications (GTC 80 "psychotherapeutic drugs")</b> |                                                      |                                                                                                                                                                                                                                                    |
|---------------------------------------------------------------------|------------------------------------------------------|----------------------------------------------------------------------------------------------------------------------------------------------------------------------------------------------------------------------------------------------------|
| <b>Antipsychotic medication class</b>                               | <b>Selective therapeutic category name (code)</b>    | <b>Specific medication</b>                                                                                                                                                                                                                         |
| First-generation antipsychotics                                     | Dopamine antagonists, butyrophenones (9153)          | Droperidol<br>Haloperidol; haloperidol decanoate;<br>haloperidol lactate                                                                                                                                                                           |
|                                                                     | Dopamine antagonists, thioxanthenes (9154)           | Chlorprothixene<br>Thiothixene; thiothixene HCL                                                                                                                                                                                                    |
|                                                                     | Dopamine antagonists, diphenylbutypiperidines (9156) | Pimozide                                                                                                                                                                                                                                           |
|                                                                     | Dopamine antagonist, dihydroindolones (9157)         | Molindone HCL                                                                                                                                                                                                                                      |
|                                                                     | Dopamine & serotonin antagonists (9159)              | Loxapine HCL, loxapine succinate                                                                                                                                                                                                                   |
| Second-generation antipsychotics                                    | Atypical, dopamine & serotonin antagonist (9158)     | Asenapine maleate<br>Clozapine<br>Iloperidone<br>Lurasidone HCL<br>Olanzapine; olanzapine pamoate<br>Paliperidone; paliperidone palmitate<br>Quetiapine fumarate<br>Risperidone, risperidone microspheres<br>Ziprasidone HCL, ziprasidone mesylate |
|                                                                     | Atypical, D2 partial agonist/5HT mixed (9851)        | Aripiprazole                                                                                                                                                                                                                                       |

| <b>Anti-diabetic medications (GTC 71 "antihyperglycemics")</b> |                                                                                                                                                           |
|----------------------------------------------------------------|-----------------------------------------------------------------------------------------------------------------------------------------------------------|
| <b>Selective therapeutic category name (code)</b>              | <b>Specific medication</b>                                                                                                                                |
| Insulins (0177)                                                | <u>insulin (all forms)</u>                                                                                                                                |
| Antihyperglycemic, insulin-release stimulant type (0178)       | Acetohexamide<br>Chlorpropamide<br>Glimepiride<br>Glipizide<br>Glyburide; glyburide micronized<br>Nateglinide<br>Repaglinide<br>Tolazamide<br>Tolbutamide |
| Antihyperglycemic, biguanide type (0179)                       | Metformin HCL                                                                                                                                             |
| Antihyperglycemic, alpha-glucosidase inhibitor (N-S) (7768)    | Acarbose<br>Miglitol                                                                                                                                      |
| Antihyperglycemic, insulin-response enhancer (N-S) (7769)      | Pioglitazone HCL<br>Rosiglitazone maleate<br>Troglitazone                                                                                                 |

| <b>Cholesterol-lowering medications</b> |                                                   |                                                                                                                                                                                                                                                                                                                                                                                                                                                                                                                                                                                   |
|-----------------------------------------|---------------------------------------------------|-----------------------------------------------------------------------------------------------------------------------------------------------------------------------------------------------------------------------------------------------------------------------------------------------------------------------------------------------------------------------------------------------------------------------------------------------------------------------------------------------------------------------------------------------------------------------------------|
| <b>General therapeutic category</b>     | <b>Selective therapeutic category name (code)</b> | <b>Specific medication</b>                                                                                                                                                                                                                                                                                                                                                                                                                                                                                                                                                        |
| Vitamins (GTC 95)                       | Niacin preparations (0204)                        | Niacin; inositol niacinate; niacinamide                                                                                                                                                                                                                                                                                                                                                                                                                                                                                                                                           |
| Cardiovascular (GTC 41)                 | Bile salt sequestrants (0236)                     | Cholestyramine, cholestyramine (with sugar)<br>Cholestyramine/aspartame<br>Colesevelam HCL<br>Colestipol HCL                                                                                                                                                                                                                                                                                                                                                                                                                                                                      |
|                                         | Lipotropics (0331)                                | Clofibrate<br>Dextrothyroxine sodium<br>Ezetimbe<br>Fenofibrate; fenofibrate nanocrystallized;<br>fenofibrate, micronized<br>Fenofibric acid; fenofibric acid (choline)<br>Fish oil, flax seed, and omega-3 combinations<br>Fluvastatin sodium<br>Gemfibroxil<br>Krill oil; krill oil/DHA/Omega-3 combinations<br>Lovastatin<br>Methionine/inositol/choline/FA<br>Niacin<br>Phytosterol combination No.1<br>Phytosterol/Omega-3/DHA/EPA/Fish oil<br>Policosanol/inositol niacin/garlic<br>Policosanol<br>Pravastatin<br>Probucol<br>Salmon oil/omega-3-fatty acids<br>Simvastatin |

| <b>Antihypertensive medications (GTC 41 "Cardiovascular")</b> |                                                                                                                                                              |
|---------------------------------------------------------------|--------------------------------------------------------------------------------------------------------------------------------------------------------------|
| <b>Selective therapeutic category name (code)</b>             | <b>Specific medication</b>                                                                                                                                   |
| Angiotensin receptor antagonist (4990)                        | Azilsartan medoxomil<br>Candesartan cilexetil<br>Eprosartan mesylate<br>Irbesartan<br>Losartan potassium<br>Olmesartan medoxomil<br>Telmisartan<br>Valsartan |
| Antihyperlipidemic – HMG-CoA & calcium channel blocker (8581) | Amlodipine/atorvastatin                                                                                                                                      |
| ACE-inhibitor/calcium channel blocker combination (9349)      | Amlodipine besylate/benazepril<br>Enalapril maleate/diltiazem maleate<br>Enalapril maleate/felodipine<br>Trandolapril/verapamil HCL                          |
| Pulmonary antihypertensives, prostacyclin-type (9515)         | Epoprostenol sodium (argenine)<br>Epoprostenol sodium (glycine)                                                                                              |

|                                              |                                                                                                                                                                                                                                                                                                                                                                                                                                                                                                                                                                                                                                                                                                                                                                       |
|----------------------------------------------|-----------------------------------------------------------------------------------------------------------------------------------------------------------------------------------------------------------------------------------------------------------------------------------------------------------------------------------------------------------------------------------------------------------------------------------------------------------------------------------------------------------------------------------------------------------------------------------------------------------------------------------------------------------------------------------------------------------------------------------------------------------------------|
|                                              | Iloprost<br>Treprostinil; treprostinil sodium<br>Treprostinil NEB accessories<br>Treprostinil/nebulizer/accessories                                                                                                                                                                                                                                                                                                                                                                                                                                                                                                                                                                                                                                                   |
| Alpha/Beta-adrenergic blocking agents (0296) | Carvedilol; carvedilol phosphate<br>Labetalol HCL                                                                                                                                                                                                                                                                                                                                                                                                                                                                                                                                                                                                                                                                                                                     |
| Alpha-adrenergic blocking agents (0297)      | Doxazosin mesylate<br>Prazosin HCL<br>Terazosin HCL                                                                                                                                                                                                                                                                                                                                                                                                                                                                                                                                                                                                                                                                                                                   |
| Vasodilators (0144)                          | Diazoxide<br>Doxazosin mesylate<br>Fenoldopam mesylate<br>Hydralazine HCL<br>Hydralazine/hydrochlorothiazide<br>Hydralazine/reserpine/HCTZ<br>Minoxidil<br>Prazosin HCL; prazosin HCL/polythiazide<br>Terazosin HCL                                                                                                                                                                                                                                                                                                                                                                                                                                                                                                                                                   |
| Sympatholytic (0145)                         | Alseroxylon<br>Clonidine; clonidine HCL<br>Chlonidine HCL/chlorthalidone<br>Deserpidine<br>Deserpidine/hydrochlorothiazide<br>Deserpidine/methyclothiazide<br>Guanabenz acetate<br>Guanadrel sulfate<br>Guanethid/hydrochlorothiazide<br>Guanethidine sulfate<br>Guanfacine HCL<br>Methyldopa<br>Methyldopa/chlorothiazide<br>Methyldopa/hydrochlorothiazide<br>Methyldopate HCL<br>Rauwolfia serpentine<br>Rauwolfia serpentine/BFMTZ<br>Rauwolfia/BFMTZ/potassium<br>Rescinnamide<br>Reserpine<br>Reserpine/chlorothiazide<br>Reserpine/chlorthalidone<br>Reserpine/hydrochlorothiazide<br>Reserpine/hydroflumethiazide<br>Reserpine/methyclothiazide<br>Reserpine/polythiazide<br>Reserpine/quinethazone<br>Reserpine/quinethazone<br>Reserpine/trichlormethiazide |
| ACE Inhibitors (0147)                        | Benazepril HCL<br>Captopril<br>Captopril/hydrochlorothiazide<br>Enalapril maleate<br>Enalapril/hydrochlorothiazide                                                                                                                                                                                                                                                                                                                                                                                                                                                                                                                                                                                                                                                    |

|                                        |                                                                                                                                                                                                                                                                              |
|----------------------------------------|------------------------------------------------------------------------------------------------------------------------------------------------------------------------------------------------------------------------------------------------------------------------------|
|                                        | <p>Enalaprilat dehydrate<br/> Fosinopril sodium<br/> Lisinopril<br/> Lisinopril/hydrochlorothiazide<br/> Moexipril HCL<br/> Perindopril erbumine<br/> Quinapril HCL<br/> Quinapril HCL/MAG CARB<br/> Ramipril<br/> Trandolapril</p>                                          |
| Miscellaneous antihypertensives (0149) | <p>Atenolol/chlorthalidone<br/> Labetolol/hydrochlorothiazide<br/> Methyclothiazide/pargyline HCL<br/> Metoprolol/hydrochlorothiazide<br/> Metyrosine<br/> Nadolol/bendroflumethiazide<br/> Nitroprusside sodium<br/> Pargyline HCL<br/> Propranolol/hydrochlorothiazide</p> |
| Vasodilators, peripheral (0153)        | <p>Cyclandelate<br/> Ergoloid mesylates<br/> Ethaverine HCL<br/> Flosequinan<br/> Isoxsuprine HCL<br/> Nicotiny alcohol tartrate<br/> Nylidrin HCL<br/> Papaverine HCL</p>                                                                                                   |

## Appendix: Sensitivity analyses

### Poisson regression of potential factors associated with outpatient medical visits among individuals with Fee-for-service Medicaid only.\*

| Characteristic                                                                                                | Unadjusted Relative Risk of Outpatient Medical Visits |            |       | Adjusted RR of Outpatient Medical Visits† |            |       |
|---------------------------------------------------------------------------------------------------------------|-------------------------------------------------------|------------|-------|-------------------------------------------|------------|-------|
|                                                                                                               | RR                                                    | 95% CI     | P     | RR                                        | 95% CI     | P     |
| <b>Female Sex (a)</b> (reference: male sex)                                                                   | 1.30                                                  | 1.26- 1.35 | <.001 | 1.27                                      | 1.23- 1.32 | <.001 |
| <b>Race/ethnicity (a)</b> (reference: white)                                                                  |                                                       |            | <.001 |                                           |            | <.001 |
| Asian and Pacific Islander                                                                                    | 1.15                                                  | 1.09- 1.22 | .     | 1.10                                      | 1.04- 1.17 | .     |
| Black                                                                                                         | .96                                                   | .92- 1.01  | .     | .94                                       | .90- .99   | .     |
| Hispanic                                                                                                      | 1.00                                                  | .96- 1.04  | .     | 1.02                                      | .98- 1.06  | .     |
| Other                                                                                                         | .97                                                   | .94- 1.00  | .     | .96                                       | .93- .99   | .     |
| <b>Age (a) †</b> (reference: 18-27)                                                                           |                                                       |            | <.001 |                                           |            | <.001 |
| 28-47                                                                                                         | 1.09                                                  | 1.05- 1.14 | .     | 1.06                                      | 1.03- 1.10 | .     |
| 48-67                                                                                                         | 1.29                                                  | 1.25- 1.34 | .     | 1.22                                      | 1.19- 1.25 | .     |
| <b>Rural County type ‡</b> (reference: urban)                                                                 | .70                                                   | .58- .85   | <.001 | .69                                       | .57- .84   | <.001 |
| <b>Psychiatric Diagnosis §</b> (reference: Schizophrenia Spectrum)                                            |                                                       |            | <.001 |                                           |            | <.001 |
| Anxiety Disorder                                                                                              | 1.22                                                  | 1.14- 1.30 | .     | 1.14                                      | 1.08- 1.21 | .     |
| Bipolar Disorder                                                                                              | 1.17                                                  | 1.12- 1.22 | .     | 1.13                                      | 1.08- 1.17 | .     |
| Major Depressive Disorder                                                                                     | 1.30                                                  | 1.23- 1.37 | .     | 1.21                                      | 1.15- 1.27 | .     |
| Other                                                                                                         | 1.15                                                  | 1.07- 1.24 | .     | 1.16                                      | 1.10- 1.22 | .     |
| <b>Any drug or alcohol use disorder diagnosed by a psychiatrist.  </b> (reference: no drug/EtOH use disorder) | .89                                                   | .86- .93   | <.001 | .94                                       | .91- .98   | .001  |
| <b>HTN, DM or Dyslipidemia ¶</b> Present (reference: not present)                                             | 1.28                                                  | 1.25- 1.30 | .001  | 1.21                                      | 1.18- 1.24 | <.001 |

\* Each adjusted model depends upon the specific variable and hypothesized confounders in the causal pathway for having at least one outpatient medical visit as outlined in (a) – (d), below.

† These age categories were those provided by the California Department of Health Care Services to the study investigators

‡ Controlling for three main demographic variables (gender, race/ethnicity, age) and county type, unless it is the predictor variable of interest.

§Controlling for main demographic variables, county type and comorbid substance abuse

|| Controlling for main demographic variables, county type and Axis I diagnosis

¶Controlling for main demographic variables, county type, Axis I diagnosis, comorbid substance abuse

**Poisson regression of potential factors associated with outpatient medical visits among individuals with Managed Medicaid only.\***

| Characteristic                                                                                             | Unadjusted Relative Risk of Outpatient Medical Visits |            |       | Adjusted RR of Outpatient Medical Visits† |            |       |
|------------------------------------------------------------------------------------------------------------|-------------------------------------------------------|------------|-------|-------------------------------------------|------------|-------|
|                                                                                                            | RR                                                    | 95% CI     | P     | RR                                        | 95% CI     | P     |
| <b>Female Sex (a)</b> (reference: male sex)                                                                | 1.24                                                  | 1.22- 1.27 | <.001 | 1.21                                      | 1.19- 1.24 | <.001 |
| <b>Race/ethnicity (a)</b> (reference: white)                                                               |                                                       |            | <.001 |                                           |            | <.001 |
| Asian and Pacific Islander                                                                                 | 1.04                                                  | .95- 1.14  | .     | 1.03                                      | 0.95- 1.11 | .     |
| Black                                                                                                      | .93                                                   | .89- .97   | .     | .93                                       | .90- .96   | .     |
| Hispanic                                                                                                   | .96                                                   | .93- .99   | .     | .98                                       | .95- 1.01  | .     |
| Other                                                                                                      | .97                                                   | .92- 1.02  | .     | .97                                       | .93- 1.01  | .     |
| <b>Age (a) †</b> (reference: 18-27)                                                                        |                                                       |            | <.001 |                                           |            | <.001 |
| 28-47                                                                                                      | 1.19                                                  | 1.13- 1.26 | .     | 1.13                                      | 1.08- 1.18 | .     |
| 48-67                                                                                                      | 1.31                                                  | 1.25- 1.38 | .     | 1.24                                      | 1.18- 1.30 | .     |
| <b>Rural County type ‡</b> (reference: urban)                                                              | .39                                                   | .25- .63   | <.001 | .42                                       | .26- .66   | <.001 |
| <b>Psychiatric Diagnosis §</b> (reference: Schizophrenia Spectrum)                                         |                                                       |            | <.001 |                                           |            | <.001 |
| Anxiety Disorder                                                                                           | 1.21                                                  | 1.14- 1.29 | .     | 1.14                                      | 1.08- 1.21 | .     |
| Bipolar Disorder                                                                                           | 1.16                                                  | 1.12- 1.20 | .     | 1.12                                      | 1.09- 1.15 | .     |
| Major Depressive Disorder                                                                                  | 1.21                                                  | 1.18- 1.24 | .     | 1.13                                      | 1.11- 1.16 | .     |
| Other                                                                                                      | 1.10                                                  | 1.07- 1.14 | .     | 1.12                                      | 1.07- 1.17 | .     |
| <b>Any drug or alcohol use disorder diagnosed by a psychiatrist</b> (reference: no drug/EtOH use disorder) | .92                                                   | .87- .97   | .001  | .96                                       | .93- .99   | .02   |
| <b>HTN, DM or Dyslipidemia ¶</b> (reference: not present)                                                  | 1.01                                                  | .91- 1.12  | .82   | 1.01                                      | .93- 1.10  | .84   |

\* Each adjusted model depends upon the specific variable and hypothesized confounders in the causal pathway for having at least one outpatient medical visit as outlined in (a) – (d), below.

† These age categories were those provided by the California Department of Health Care Services to the study investigators

‡ Controlling for three main demographic variables (gender, race/ethnicity, age) and county type, unless it is the predictor variable of interest.

§Controlling for main demographic variables, county type and comorbid substance abuse

¶ Controlling for main demographic variables, county type and Axis I diagnosis

¶¶Controlling for main demographic variables, county type, Axis I diagnosis, comorbid substance abuse
